# Supplementary material for: Research on the Jobs-Housing Balance of Residents in Peri-Urbanization Areas in China: A Case Study of Zoucheng County
Source: MDPI journal article supplement (doi:10.3390/su14137921), 2022-06-29
Supplement: s1 [file s1]

## Supplementary Material

Questionnaire Number: \_\_\_\_\_

### An Investigation on the Job-housing Status of Residents in Zoucheng County

Dear Sir or Madam,

Thank you again for your support and participation. The questionnaire is designed to survey the job-housing status of residents in Zoucheng County. Additionally, we hope that through your questionnaire, a better understanding of the objective conditions of the job-housing status of residents in Zoucheng will be delivered, and real reference materials for the construction of urban and rural areas that people enjoy living and working in will be provided. We promise to keep your answers confidential, and the results from the voluntary questionnaire will be used for statistical analysis of the research only. Please complete carefully according to your actual situation. Thank you again for your sincere cooperation!

National Natural Science Foundation of China (51878393 Research Group)

Investigation Site: Zoucheng County \_\_\_\_\_ Township/Town/Sub-district

To ensure the authenticity of the questionnaire, please leave your contact information. You are assured that the results from the questionnaire will be used for the statistical analysis of this research only. Your personal information will never be divulged. Thank you for your understanding and support of our work!

Name: \_\_\_\_\_

Contact information: \_\_\_\_\_

Address: Zoucheng County \_\_\_\_\_ Township/Town/Sub-district \_\_\_\_\_ Village/Community

Interviewer: \_\_\_\_\_

Date of the visit: \_\_\_\_\_

#### I. Individual situation

##### 1. Age:

- |              |          |           |
|--------------|----------|-----------|
| 1. $\leq 20$ | 2. 21~30 | 3. 31~40  |
| 4. 41~50     | 5. 51~60 | 6. $> 60$ |

##### 2. Gender:

- |        |          |
|--------|----------|
| 1. Man | 2. Woman |
|--------|----------|

##### 3. Hukou:

- |                |                       |
|----------------|-----------------------|
| 1. Urban hukou | 2. Agricultural hukou |
|----------------|-----------------------|

##### 4. Education level:

- |                                 |                            |                   |
|---------------------------------|----------------------------|-------------------|
| 1. Junior high school and below | 2. High school             | 3. Junior college |
| 4. Bachelor                     | 5. Master degree and above |                   |

##### 5. Monthly income (Considering wages, bonuses, welfare, and other income, etc. if any):

- |                     |                     |                    |
|---------------------|---------------------|--------------------|
| 1. $\leq 2000$ Yuan | 2. 2001~3500 Yuan   | 3. 3501~5000 Yuan  |
| 4. 5001~8000 Yuan   | 5. 8001~10,000 Yuan | 6. $> 10,000$ Yuan |

##### 6. Is there farm business income in your income?

- |        |       |
|--------|-------|
| 1. Yes | 2. No |
|--------|-------|

##### 7. Where are you living now (county/district)?

- |                      |                     |                     |                        |
|----------------------|---------------------|---------------------|------------------------|
| 1. Zoucheng county   | 2. Yanzhou district | 3. Weishan county   | 4. Sishui county       |
| 5. Rencheng district | 6. Qufu district    | 7. Yutai county     | 8. Wenshang county     |
| 9. Liangshan county  | 10. Jinxiang county | 11. Jiaxiang county | 12. Not in Jining city |

8. Which town or Sub-district are you living in?

- |                          |                                                          |                        |
|--------------------------|----------------------------------------------------------|------------------------|
| 1. Gangshan Sub-district | 2. Qianquan Sub-district                                 | 3. Fushan Sub-district |
| 4. Xiangcheng town       | 5. Chengqian town                                        | 6. Dashu town          |
| 7. Beisu town            | 8. Zhongxiandian town                                    | 9. Tangcun town        |
| 10. Taiping town         | 11. Shiqiang town                                        | 12. Yishan town        |
| 13. Kanzhuang town       | 14. Zhangzhuang town                                     | 15. Tianhuang town     |
| 16. Guoli town           | 17. Other town/Sub-district outside Zoucheng county_____ |                        |

9. The type of your residence now:

1. Village                      2. Town                      3. Sub-district

---

II. Household Situation

10. Marital Status:

1. Married                      2. Single

11. Household Structure:

1. Couple family              2. Stem family              3. Single-family              4. Nuclear family

12. How many children do you have at present?\_\_\_\_\_

13. The educational stage of your children.

1. Not enrolled to school      2. Preschool                      3. Primary school              4. Junior high school  
5. High school

14. Who usually takes school-age children to school every day?

1. Children's parents                      2. Children's grandparents  
3. Children go to school by themselves.                      4. Others (Please specify)\_\_\_\_\_

15. Current housing tenure:

1. House with property right                      2. House without property right

16. Current housing area:

1. 60 m<sup>2</sup> and below              2. 61~90 m<sup>2</sup>                      3. 91~120 m<sup>2</sup>                      4. 121~150 m<sup>2</sup>                      5. more than 150 m<sup>2</sup>

17. The main reason why you choose your current residence?

- |                                |                                            |
|--------------------------------|--------------------------------------------|
| 1. Close to the workplace      | 2. Convenient for children to go to school |
| 3. Perfect service facilities  | 4. Sound ecological environment            |
| 5. Danwei housing distribution | 6. Arrange for relocation household        |
| 7. Affordable housing price    | 8. Low living cost                         |
| 9. Convenient transportation   | 10. Others                                 |

18. Do you want to change your residence in the next five years?

1. No                      2. Yes

19. Your ideal place to move is:

1. Village              2. Towns in Zoucheng county                      3. Urban area in Zoucheng county  
4. Other districts and counties in Jining city (Please write specific districts and counties):\_\_\_\_\_  
5. Other cities in Shandong province (Please write specific cities):\_\_\_\_\_  
6. Other Provinces/municipalities directly under the Central Government (Please write specific provinces/municipalities directly under the Central Government):\_\_\_\_\_

20. Why do you want to change your residence?

- |                                     |                                    |
|-------------------------------------|------------------------------------|
| 1. Close to the workplace           | 2. For children to go to school    |
| 3. Reunion with family              | 4. Improve the living quality      |
| 5. Reduce living cost               | 6. Improve the supporting standard |
| 7. Arrange for relocation household | 8. Others (Please specify)_____    |

---

### III. Employment Situation

21. Current workplace (town/Sub-district):

- |                          |                          |                        |
|--------------------------|--------------------------|------------------------|
| 1. Gangshan Sub-district | 2. Qianquan Sub-district | 3. Fushan Sub-district |
| 4. Xiangcheng Town       | 5. Chengqian Town        | 6. Dashu Town          |
| 7. Beisu Town            | 8. Zhongxindian Town     | 9. Tangcun Town        |
| 10. Taiping Town         | 11. Shiqiang Town        | 12. Yishan Town        |
| 13. Kanzhuang Town       | 14. Zhangzhuang Town     | 15. Tianhuang Town     |
| 16. Guoli Town           |                          |                        |

22. Where is your workplace?

- |            |         |                 |
|------------|---------|-----------------|
| 1. Village | 2. Town | 3. Sub-district |
|------------|---------|-----------------|

23. Occupation:

- |                                                             |                           |                             |
|-------------------------------------------------------------|---------------------------|-----------------------------|
| 1. Employees of government agencies and public institutions | 2. Enterprise employees   |                             |
| 3. Works                                                    | 4. Social service workers | 5. Self-employed individual |

24. Why do you choose to work there?

- |                                         |                                  |                                       |
|-----------------------------------------|----------------------------------|---------------------------------------|
| 1. Satisfied salary                     | 2. Meet my own skills            | 3. Cannot find a job in other places  |
| 4. It is convenient to pick up children |                                  | 5. I like the living environment here |
| 6. Low living cost                      | 7. Close to home                 | 8. Never been anywhere else           |
| 9. Spouse's work is settled             | 10. Others (Please specify)_____ |                                       |

---

### IV. Commuting Situation

25. How do you go to work?

- |                           |                          |
|---------------------------|--------------------------|
| 1. Private transportation | 2. Public transportation |
|---------------------------|--------------------------|

26. How long do you usually take from home to workplace?

- |              |              |              |              |
|--------------|--------------|--------------|--------------|
| 1. ≤10 min   | 2. 11~20 min | 3. 21~30 min | 4. 31~40 min |
| 5. 41~50 min | 6. 51~60 min | 7. >60 min   |              |

27. Please estimate one-way distance to your workplace:\_\_\_\_\_km

28. Are you satisfied with your daily commute (commute time, distance, cost, etc.)

- |        |       |
|--------|-------|
| 1. Yes | 2. No |
|--------|-------|

29. The most dissatisfied reason is:

- |                                 |                         |                           |         |
|---------------------------------|-------------------------|---------------------------|---------|
| 1. Far commute distance         | 2. Long commute time.   | 3. Congested traffic      | 4. High |
| commute cost                    | 5. Poor commute comfort | 6. Less secure of commute |         |
| 7. Others (Please specify)_____ |                         |                           |         |

30. How long does it take for you to walk to the nearest bus stop?

- |            |             |              |              |              |
|------------|-------------|--------------|--------------|--------------|
| 1. ≤5 min  | 2. 6~10 min | 3. 11~15 min | 4. 16~20 min | 5. 21~30 min |
| 6. >30 min |             |              |              |              |

---

### V. Supporting Construction of Public Facilities

31. Where do you usually go on weekdays?

- |                                         |                |                                |
|-----------------------------------------|----------------|--------------------------------|
| 1. Shops                                | 2. Restaurants | 3. Cultural and leisure places |
| 4. Banks, posts, and telecommunications |                | 5. Courier station             |
| 6. Maintenance point                    | 7. Warehouse   | 8. Hospital or clinic          |
| 9. Nowhere                              |                |                                |

32. Where (How) do you have lunch on weekdays?

- |                    |                                           |                      |
|--------------------|-------------------------------------------|----------------------|
| 1. Public canteen  | 2. Professional food and beverage outlets | 3. Takeaway food     |
| 4. Roadside stalls | 5. Bring meals                            | 6. Go home for lunch |

33. Are you satisfied with the catering, shopping, medical care, transportation, and other service facilities near your workplace?

- |        |       |
|--------|-------|
| 1. Yes | 2. No |
|--------|-------|

34. Which aspect do you think needs to be improved most?

- |                              |                                    |                       |
|------------------------------|------------------------------------|-----------------------|
| 1. Catering facilities       | 2. Leisure and shopping facilities | 3. Medical facilities |
| 4. Transportation facilities | 5. Others (Please specify)_____    |                       |

35. Which facilities around your residence do you pay more attention to? [Choose at most two answers]

- |                                  |                                         |
|----------------------------------|-----------------------------------------|
| 1. Commercial service facilities | 2. Cultural and recreational facilities |
| 3. Medical and health facilities | 4. Educational facilities               |
| 5. Transportation facilities     | 6. Caring facilities for seniors        |
| 7. Others (Please specify)_____  |                                         |

**[End! Thanks again for your support of this research!]**
