# Supplementary material for: Research on the Jobs-Housing Balance of Residents in Peri-Urbanization Areas in China: A Case Study of Zoucheng County
Source: MDPI journal article supplement (doi:10.3390/su14137921), 2022-06-29
Supplement: s1 [file s1]

Archive with 1 entries (1 files):
- sustainability-1760690-supplementary.pdf
